# Supplementary material for: NAD+ Anabolism Disturbance Causes Glomerular Mesangial Cell Injury in Diabetic Nephropathy
Source: MDPI journal article supplement (doi:10.3390/ijms23073458), 2022-03-22
Supplement: s1 [file s1]

### Supplementary Materials

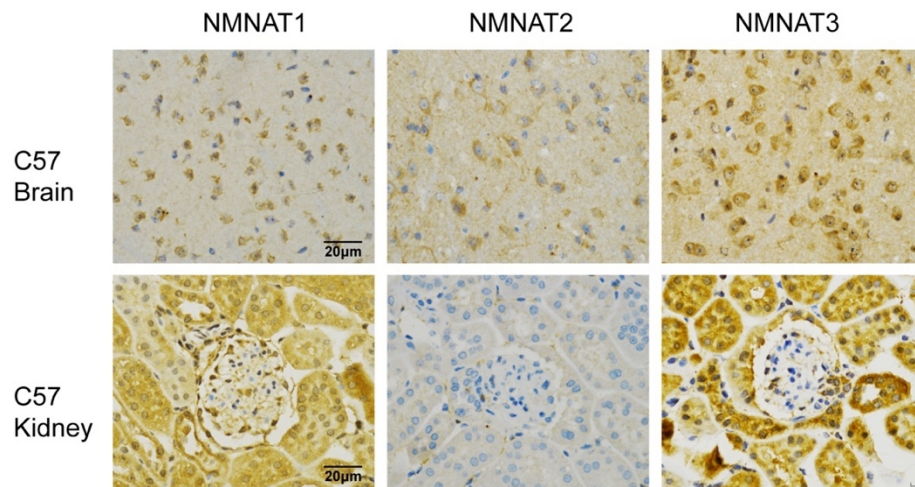

**Supplementary 1.** The expression of NMNATs in mice kidney and brain. Immunohistochemical staining was used to detect the expression and localization of NMNATs in brain and kidney of male C57BL/6J mice. 20×10 magnification by light microscope. The scale bar=20μm.

#### The sequence of NMNAT1:

GATTACAAGGATGACGACGATAAGGAAAATTCCGAGAAGACTGAAGTGGTTCCTTGCTTGT  
GGTTCATTCAATCCCATCACCAACATGCACCTCAGGTTGTTTGAGCTGGCCAAGGACTACATGA  
ATGGAACAGGAAGGTACACAGTTGTCAAAGGCATCATCTCTCCTGTTGGTGATGCCTACAAGA  
AGAAAGGACTCATTCCTGCCTATCACCGGGTCATCATGGCAGAACTTGCTACCAAGAATTCTAA  
ATGGGTGGAAGTTGATACATGGGAAAGTCTTCAGAAAGGAGTGGAAAGAGACTCTGAAGGTGCT  
AAGACACCATCAAGAGAAATTGGAGGCTAGTGACTGTGATCACCAGCAGAACTCACCTACTCT  
AGAAAGGCCTGGAAGGAAGAGGAAGTGGACTGAAACACAAGATTCTAGTCAAAAGAAATCCC  
TAGAGCCAAAAACAAAAGCTGTGCCAAAGGTCAAGCTGCTGTGTGGGGCAGATTTATTGGAGT  
CCTTTGCTGTTCCCAATTTGTGGAAGAGTGAAGACATCACCCAAATCGTGGCCAACTATGGGCT  
CATATGTGTTACTCGGGCTGGAATGATGCTCAGAAGTTTATCTATGAATCGGATGTGCTGTGG  
AAACACCGGAGCAACATTCACGTGGTGAATGAATGGATCGCTAATGACATCTCATCCACAAAA  
ATCCGGAGAGCCCTCAGAAGGGGCCAGAGCATTGCTACTTGGTACCAGATCTTGTCCAAGAA  
TACATTGAAAAGCATAATTTGTACAGCTCTGAGAGTGAAGACAGGAATGCTGGGGTCATCCTG  
GCCCCTTGCAGAGAAACACTGCAGAAGCTAAGACATAG

#### The sequence of NAMPT:

GATTACAAGGATGACGACGATAAGAATCCTGCGGCAGAAGCCGAGTTCAACATCCTCCTGGCC  
ACCGACTCCTACAAGTTACTCACTATAAACAATATCCACCCAACACAAGCAAAGTTTATTCCT  
ACTTTGAATGCCGTGAAAAGAAGACAGAAAACCTCAAATTAAGGAAGGTGAAATATGAGGAA  
ACAGTATTTTATGGGTTGCAGTACATTCTTAATAAGTACTTAAAAGGTAAAGTAGTAACCAAAG  
AGAAAATCCAGGAAGCCAAAGATGTCTACAAAGAACATTTCCAAGATGATGTCTTTAATGAAA  
AGGGATGGAACATACATTCTTGAGAAGTATGATGGGCATCTTCCAATAGAAATAAAAGCTGTTCC  
TGAGGGCTTTGTCATTCCAGAGGAAATGTTCTCTTCACGGTGGAAAACACAGATCCAGAGTGT  
TACTGGCTTACAAATTGGATTGAGACTATTCTTGTTTCAGTCCTGGTATCCAATCACAGTGGCCAC

AAATTCTAGAGAGCAGAAGAAAATATTGGCCAAATATTTGTTAGAACTTCTGGTAACTTAGAT  
GGTCTGGAATACAAGTTACATGATTTTGGCTACAGAGGAGTCTCTTCCCAAGAGACTGCTGGCA  
TAGGAGCATCTGCTCACTTGGTTAACTTCAAAGGAACAGATACAGTAGCAGGACTTGCTCTAAT  
TAAAAAATATTATGGAACGAAAGATCCTGTTCCAGGCTATTCTGTTCCAGCAGCAGAACACAGT  
ACCATAACAGCTTGGGGGAAAGACCATGAAAAAGATGCTTTTGAACATATTGTAACACAGTTTT  
CATCAGTGCCTGTATCTGTGGTCAGCGATAGCTATGACATTTATAATGCGTGTGAGAAAATATG  
GGGTGAAGATCTAAGACATTTAATAGTATCAAGAAGTACACAGGCACCACTAATAATCAGACC  
TGATTCTGGAAACCCTCTTGACACTGTGTTAAAGGTTTTGGAGATTTTAGGTAAGAAGTTTCCTG  
TACTGAGAACTCAAAGGGTTACAAGTTGCTGCCACCTTATCTTAGAGTTATTCAAGGGGATGG  
AGTAGATATTAATACCTTACAAGAGATTGTAGAAGGCATGAAACAAAAAATGTGGAGTATTGA  
AAATATTGCCTTCGGTTCTGGTGGAGGTTTGCTACAGAAGTTGACAAGAGATCTCTTGAATTGTT  
CCTTCAAGTGTAGCTATGTTGTAACATAATGGCCTTGGGATTAACGTCTTCAAGGACCCAGTTGCT  
GATCCCAACAAAAGGTCCAAAAAGGGCCGATTATCTTTACATAGGACGCCAGCAGGGAATTTT  
GTTACACTGGAGGAAGGAAAAGGAGACCTTGAGGAATATGGTCAGGATCTTCTCCATACTGTCT  
TCAAGAATGGCAAGGTGACAAAAAGCTATTCATTTGATGAAATAAGAAAAAATGCACAGCTGA  
ATATTGAACTGGAAGCAGCACATCATTAG

All cDNAs were synthesized and detected by a sequencing company (GENEWIZ, Suzhou, China)
